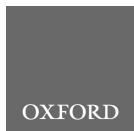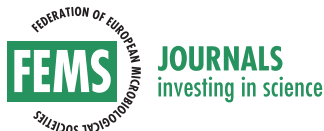

## ERRATUM

# Major changes in the composition of a Southern Ocean bacterial community in response to diatom-derived dissolved organic matter

Marine Landa<sup>1,\*†‡</sup>, Stéphane Blain<sup>1</sup>, Jérôme Harmand<sup>2</sup>, Sébastien Monchy<sup>3</sup>, Alain Rapaport<sup>4</sup> and Ingrid Obernosterer<sup>1</sup>

<sup>1</sup>CNRS, Sorbonne Universités, UPMC Univ Paris 06, Laboratoire d'Océanographie Microbienne (LOMIC), Observatoire Océanologique, F-66650, Banyuls/mer, France, <sup>2</sup>LBE, Univ. Montpellier, INRA, Narbonne, France, <sup>3</sup>Univ. Littoral Côte d'Opale, CNRS, Univ. Lille, UMR 8187, LOG, Laboratoire d'Océanologie et de Géosciences, F 59 000 Lille, France and <sup>4</sup>MISTEA, Univ. Montpellier, INRA, Montpellier SupAgro, 2, pl. Viala 34060 Montpellier, France

\*Corresponding author: 1156 High Street, Santa Cruz, CA 95064, USA. Tel: +1-831-459-1901; Fax: +1-831-459-4882; E-mail: [mlandabe@ucsc.edu](mailto:mlandabe@ucsc.edu)

†Present Address: Ocean Sciences Department, University of California, Santa Cruz, CA 95064, USA.

‡Marine Landa, <http://orcid.org/0000-0001-7129-1683>

The publisher apologizes that the one sentence summary in this paper (DOI: 10.1093/femsec/fyy034) contained errors. The text has now been corrected.
